# Supplementary material for: Inhibition of miR-222 by Oncolytic Adenovirus-Encoded miRNA Sponges Promotes Viral Oncolysis and Elicits Antitumor Effects in Pancreatic Cancer Models
Source: MDPI journal article supplement (doi:10.3390/cancers13133233), 2021-06-28
Supplement: s1 [file s1]

# **Inhibition of miR-222 by Oncolytic Adenovirus-Encoded miRNA Sponges Promotes Viral Oncolysis and Elicits Antitumor Effects in Pancreatic Cancer Models**

Giulia Raimondi, Sabrina Gea-Sorlí, Marc Otero-Mateo, Cristina Fillat



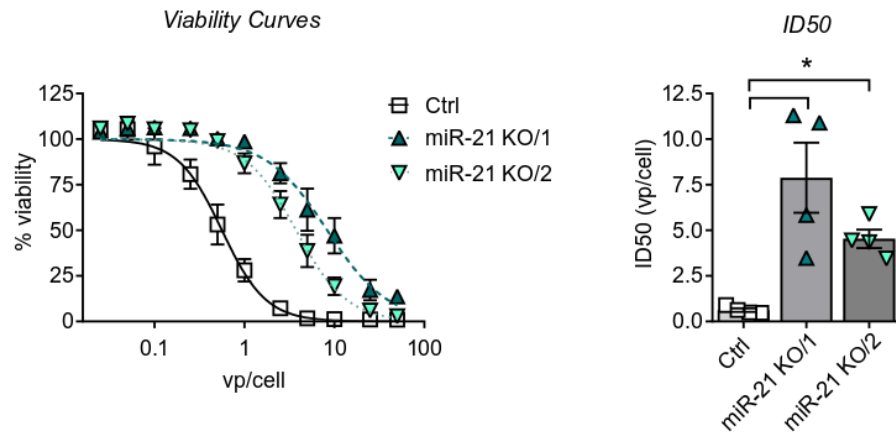

**Figure S2. Sensitivity of PANC-1 miR-21KO clones to adenoviral infections.** PANC-1 Ctrl cells and miR-21 clones KO/1 and KO/2 were infected with a battery of Adwt doses. Cell viability was measured 7 days post infection (PI) by MTT assay, and infectious dose (ID<sub>50</sub>) values determined. Data are shown as mean ± SEM for at least 3 independent biological replicates. Significance was assessed using a two-tailed Mann-Whitney test. \**p* < 0.05.

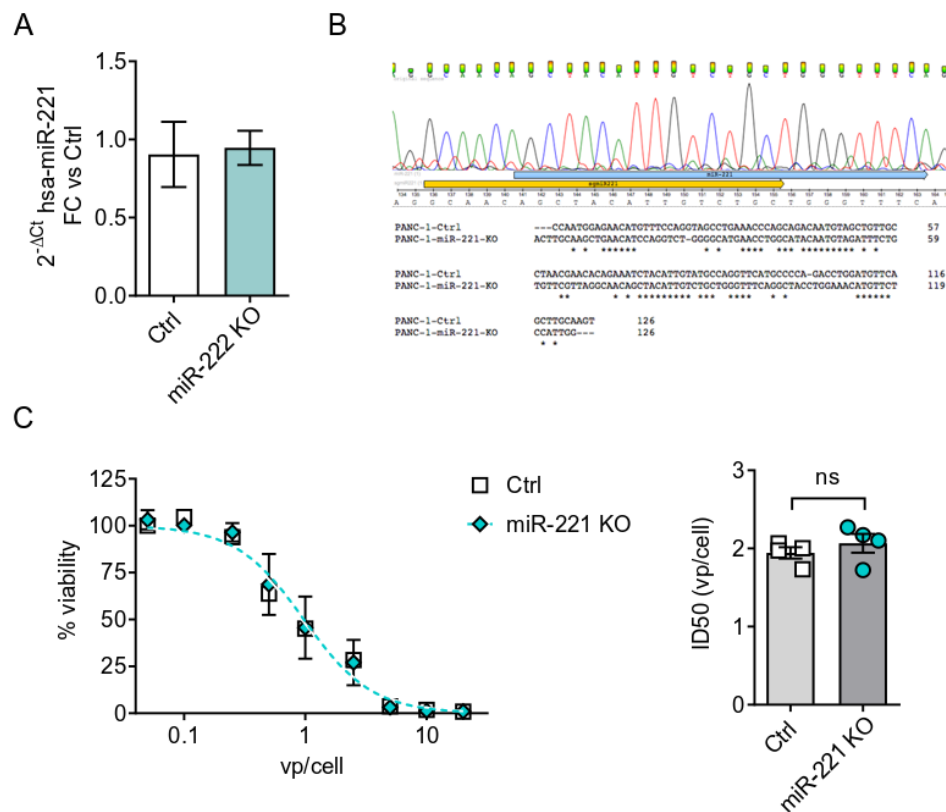

**Figure S3. miR-221 response to adenoviral oncolysis.** A. miR-221 expression in Ctrl and miR-222 KO cells, results are represented as Fold Change with Ctrl cells. B. DNA sequence alignment of miR-221 genomic region in miR-221 KO cells compared with control cells. C. PANC-1 Ctrl and miR221 KO cells infected with a battery of Adwt doses. Cell viability was measured 7 days PI by MTT assay, and ID<sub>50</sub> values were determined. Data are shown as mean ± SEM for at least 3 independent biological replicates. Significance was assessed using a two-tailed Mann-Whitney test.

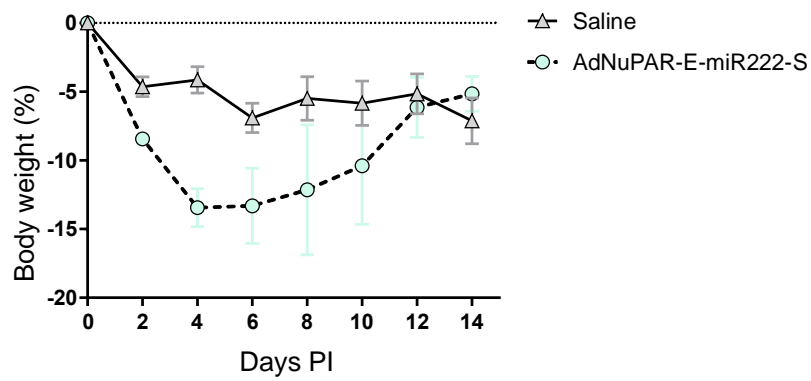

**Figure S4. Follow-up of body weight.** Percentage of body weight variation in immunocompetent C57Bl/6 mice after intravenous administration of saline solution or AdNuPAR-E-miR222-S at  $5 \times 10^{10}$ vp/animal.

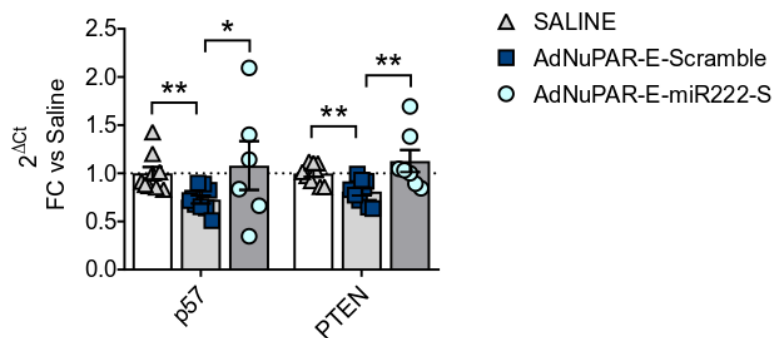

**Figure S5. p57 and PTEN gene expression in PANC-1 xenografts.** qPCR analysis of p57 and PTEN mRNA in PANC-1 tumors treated with saline, AdNuPAR-E-Scramble or AdNuPAR-E-miR222-S at  $5 \times 10^{10}$ vp/animal ( $n \geq 6$  tumors/group). mRNA values were relativized to GAPDH expression in each replicate and represented as FC to saline treated. Data are shown as mean  $\pm$  SEM for at least 6 values. Significance was assessed using a two-tailed Mann-Whitney test. \* $p < 0.05$ , \*\* $p < 0.01$ .

**Table S1.** List of sgRNAs used in the study.

| Targeted miRNA | sgRNA Fw (5' → 3')        | sgRNA Rv (5' → 3')        |
|----------------|---------------------------|---------------------------|
| hsa-miR-21     | caccgTCATGGCAACACCAGTCGAT | aaacATCGACTGGTGTGCCATGAc  |
| hsa-miR-93     | caccgCTCCAAAGTGCTGTTCGTGC | aaacGCACGAACAGCACTTTGGAGc |
| hsa-miR-221    | caccGCAACAGCTACATTGTCTGC  | aaacGCAGACAATGTAGCTGTTGC  |
| hsa-miR-222    | caccgACGAAAGACAGGATCTACAC | aaacGTGTAGATCCTGTCTTTCGTc |

**Table S2.** List of primers used for sequencing and cloning processes. For the primers set miRNA\_Tails, small letters represent homology with adenoviral E4 regions and capital letters represent CMV promoter recognizing sequences.

| Primer set           | Primer Fw (5' → 3')                                                    | Primer Rv (5' → 3')                                                | Application |
|----------------------|------------------------------------------------------------------------|--------------------------------------------------------------------|-------------|
| <i>miR21KO_Val</i>   | CCACACTCTGTCGTATCTGTG                                                  | AAGTGCCACCAGACAGAAGG                                               | Sequencing  |
| <i>miR93KO_Val</i>   | TGAGGGAGACCAGACCCTTT                                                   | TTCTGCTTCCCCATGAACCT                                               | Sequencing  |
| <i>miR-221KO_Val</i> | GTCCCAGCATTTCTGACTGTTGG                                                | GGCTTGTGGGTGCTATGCCTTC                                             | Sequencing  |
| <i>miR-222KO_Val</i> | GCTGGATCTCCAGCACCTAAG                                                  | CCCAAGCCCCAGCTGATAATG                                              | Sequencing  |
| <i>LCRISPR_Val</i>   | GAGGGCCTATTTCCTATGATT                                                  | GGAGTGGAATTGGCTCCGGTGC<br>CC                                       | Sequencing  |
| <i>miRVec_Val</i>    | CATGGTCCTGCTGGAGTTCG                                                   | CTTGCCAAACCTACAGGTGG                                               | Sequencing  |
| <i>AdV_Val</i>       | CCAGAAACGAAAGCCAAAAA                                                   | TAATGAGGGGGTGGAGTTTG                                               | Sequencing  |
| <i>miRNA_Tails</i>   | gaaaactacaattccaacacatacaagttactccgc<br>cctaa<br>CTTTTATTTTATCGAATCTGC | cgtggcgcggggcgtgggaacggggcgggtgac<br>gtaggtt<br>ACATTGATTATTGACTAG | Cloning     |

**Table S3.** List of ssDNA used for the construction of miRNA sponges. Bold sequences represent EcoRI restriction sites, red sequences represent extra stop codons inserted.

| ssDNA for sponges  | Sponge sequence                                                                                          | Final Primer sequence                                                                                                                |
|--------------------|----------------------------------------------------------------------------------------------------------|--------------------------------------------------------------------------------------------------------------------------------------|
| Primer Scramble Fw | GTTCTTGCTGCACACGTAGCTGTAAGGT<br>GTAGAACGCCAGCTAACGTAGTGGATC<br>TCATGTACACAACGACGTGAGTTCGATC<br>GCTCCTCAA | <b>AATTCTAATGA</b> GTTCTTGCTGCACACGT<br>AGCTGTAAGGTGTAGAACGCCAGCTAA<br>CGTAGTGGATCTCATGTACACAACGAC<br>GTGAGTTCGATCGCTCCTCAAG         |
| Primer Scramble Rv | TTGAGGAGCGATCGAACTCACGTCGTT<br>GTGTACATGAGATCCACTACGTTAGCTG<br>GCGTTCTACACCTTACAGCTACGTGTGC<br>AGCAAGAAC | <b>AATTCTT</b> GAGGAGCGATCGAACTCACG<br>TCGTTGTGTACATGAGATCCACTACGTT<br>AGCTGGCGTTCTACACCTTACAGCTACG<br>TGTGCAGCAAGAAC <b>TCATTAG</b> |
| Primer miR222-S Fw | ACCCAGTAGGTCATGTAGCTGTACACC<br>CAGTAGGTCATGTAGCTGCATACCCAGT<br>AGGTCATGTAGCTCGTAACCCAGTAGG<br>TCATGTAGCT | <b>AATTCTAATGA</b> ACCCAGTAGGTCATGT<br>AGCTGTACACCCAGTAGGTCATGTAGCT<br>GCATACCCAGTAGGTCATGTAGCTCGTA<br>ACCCAGTAGGTCATGTAGCT <b>G</b> |
| Primer miR222-S Rv | AGCTACATGACCTACTGGGTACGAGCT<br>ACATGACCTACTGGGTATGCAGCTACAT<br>GACCTACTGGGTGTACAGCTACATGAC<br>CTACTGGGT  | <b>AATTC</b> AGCTACATGACCTACTGGGTAC<br>GAGCTACATGACCTACTGGGTATGCAG<br>CTACATGACCTACTGGGTGTACAGCTAC<br>ATGACCTACTGGGT <b>TCATTAG</b>  |

**Table S4.** List of primers used for gene expression analysis via qRT-PCR.

| Target Gene        | Primer Fw (5' → 3')         | Primer Rv (5' → 3')      |
|--------------------|-----------------------------|--------------------------|
| <i>Ad Hexo 1/2</i> | GCCGCAGTGGTCTTACATGCACATC   | CAGCACGCCGCGGATGTCAAAG   |
| <i>ALB</i>         | GCTGTCATCTCTTGTGGGCTGT      | GGCTATCCAAACTCATGGGAG    |
| <i>BPTF</i>        | CGAAAAGGAGGAATCCGAGAGG      | CGTAACATCAGGCTCACTCCAGC  |
| <i>DDX21</i>       | TCATCAAGGACGCACTATCATCT     | CCTTTCAGGGTGATTTCCTTT    |
| <i>EGFP</i>        | AAGATCCGCCACAACATCGA        | AACTCCAGCAGGACCATGTG     |
| <i>HPRT</i>        | GATATAAGCCAGACTTTGTTGGATTTG | CTTGAACTCTCATCTTAGGCTTTG |
| <i>KPNA-2</i>      | CGTCTTCACAGATTCAAGAACAAGG   | CCTCTTCAGCATCTGGTCATCC   |
| <i>NOLC-1</i>      | TTCCTGCGCGATAACCAACTC       | CCTGTAACCTTCGCTCTGGGA    |
| <i>P57</i>         | CAAGAGGCTGCGGTGAGC          | GGACCGTTCATGTAGCAGCAACC  |
| <i>PTEN</i>        | CATACCAGGACCAGAGGAAACC      | CGTCAAATCCAGAGGCTAGCAG   |
| <i>TCOF-1</i>      | CGATAACCAACTCTCAGAGGTGG     | CTAAGAGGGAAGAGGCATTGG    |
